# Supplementary material
Source: PubMed Central journal article supplement (PMC5541214)
Supplement: AEM.00989-17_zam999117978s1.pdf [file AEM.00989-17_zam999117978s1.pdf]

## SUPPLEMENTAL MATERIAL

### TEXT S1

**Field operation and soil sampling.** Fifteen 2-m<sup>2</sup> field-plots, each isolated by fiberglass frames, were selected from two series of plots that were established in the spring of 1999 and 2010, respectively, and described previously (1, 2). The macrolide “MACRO” treatment group consisted of four replicated plots that received annually (2010 – 2014) a spring application of a mixture of erythromycin (ERY), azithromycin (AZI), and clarithromycin (CLN) to achieve concentrations for each drug of ten mg kg<sup>-1</sup> soil to a depth of 15 cm (1). The control “UTC” group referred to eight plots that never received any antibiotics but that were otherwise managed exactly as described for the treated plots in the same study. The “SCT” treatment group consisted of three plots that have, since 1999, received annually a mixture of antibiotics commonly used in swine production, namely sulfamethazine (SMZ), chlortetracycline (CTC) and tylosin (TYL) (2). During 1999 – 2004, the annual application concentrations for each drug were 1 mg kg<sup>-1</sup> soil, while the application concentrations were increased to 10 mg kg<sup>-1</sup> soil for the period of 2005 – 2014. In June of each year treated plots were amended by mixing in mixtures of the antibiotics to 1 kg of soil from each field-plot, followed by incorporation of the amended soil into the corresponding field-plots to a depth of 15 cm using a mechanized rototiller. Plots were cropped continuously to soybeans (*Glycine max* var. Harosoy) during each growing season, and received no further management other than manual weeding. For the purpose of metagenomic fosmid library construction, soil cores were collected from each replicate plot of the chosen treatment using a T-sampler. The soil samples were then pooled and sieved to a maximum particle size of 2 mm, followed by extraction of high-molecular-weight metagenomic DNA either immediately, or

after 4°C storage for less than 24 h. Soil samples were additionally kept at -20°C for future analysis.

***Extraction of high-molecular-weight metagenomic DNA from soil.*** High-molecular-weight metagenomic DNA was extracted from soil sample using an indirect DNA extraction method as described previously (3, 4). Briefly, 100 gram of the sieved soil sample was homogenized in 400 ml of pre-chilled disruption-buffer containing 50 mM Tris-HCl (pH 8.0) and 0.2 M NaCl using a Waring blender in a 4°C room. The homogenization condition consisted of three one-minute period of blending and two one-minute cooling intervals during which the blender-jug was placed in an ice-water bath. The homogenate was centrifuged at 1,000 x g for 15 min at 4°C to recover the bacterial-cell containing supernatant, whereas the sediment was re-homogenized using fresh disruption-buffer and the same condition as described above. After three successive rounds of homogenization, the detached bacterial cell was pelletized from the supernatant by centrifugation (23, 000 x g, 20 min, 4°C), and subsequently washed twice by resuspending in pre-chilled washing-buffer [10 mM Tris-HCl (pH 8.0) and 400 mM of EDTA (pH 8.0)] followed by centrifugation at the same setting. To perform “in-gel” lysis of the recovered bacterial cells, the washed pellet was embedded within 1% SeaPlaque® GTG® low-melting point agarose (Lonza, Rockland, ME) prepared in 1X TBE buffer and cast in strips of 10-well disposable plug moulds (Bio-Rad, Mississauga, ON). After setting, these bacterial cell-containing plugs were extruded from the plug moulds and incubated in a lysis-buffer consisted of 1% (w/v) Sarkosyl, 1% (w/v) sodium deoxycholate, 1 mg/ml lysozyme, 10 mM Tris-HCl (pH 8.0), 0.2 M EDTA (pH 8.0), and 50 mM NaCl, at 37°C for 1 h. The agarose plugs were then transferred to the ESP buffer [1% Sarkosyl, 1 mg/ml proteinase K, and 0.5 M EDTA (pH 8.0)] and incubated further at 55°C for 16 – 18 h. To inactivate proteinase K, the serine protease inhibitor

phenylmethylsulfonyl fluoride was added to the agarose-plugs/ESP buffer mixture from a freshly prepared stock at a final concentration of 1 mM and incubated at room temperature for 1 h. After washing the agarose plugs in a 10 mM TRIS-HCl (pH 8.0) buffer supplemented with 1 mM of EDTA (pH 8.0) for three 15 min periods with mild-agitation, the agarose plugs were stored in a 10 mM Tris-HCl (pH 8.0) buffer supplemented with 50 mM EDTA (pH 8.0) at 4 °C for an overnight. Pulse-field gel electrophoresis (PFGE), performed with a CHEF-DR<sup>®</sup> III variable angle system (Bio-Rad) (Run parameters: switch time, 1 – 25 sec; angle, 120°; voltage, 6V cm<sup>-1</sup>; temperature, 12°C; run time, 16 h), was used to size-fractionate the soil-derived metagenomic DNA entrapped within the treated agarose plugs onto a freshly prepared 1% agarose gel, in 0.5X TBE buffer, with the region encompassing the molecular size of 25 – 70 kb excised thereafter. The size-selected metagenomic DNA was electro-eluted from the excised gel block and concentrated by ethanol precipitation. No additional shearing of DNA was necessary before downstream application, as general handling and purification process was enough to produce fragments with optimal size (25 - 40 kb) for fosmid library construction.

***Selection for antibiotic-resistant metagenomic fosmid clones.*** Diluted metagenomic clone library cultures were plated onto LB-agar plates supplemented with one of the following antibiotics at the indicated concentration: kanamycin (KAN, 50 µg ml<sup>-1</sup>), gentamicin (GEN, 20 µg ml<sup>-1</sup>), tetracycline (TET, 4 µg ml<sup>-1</sup>), chlortetracycline (CTC, 64 µg ml<sup>-1</sup>), tylosin (TYL, 2,048 µg ml<sup>-1</sup>), erythromycin (ERY, 256 µg ml<sup>-1</sup>), azithromycin (AZI, 32 µg ml<sup>-1</sup>), cefotaxime (CAX, 4 µg ml<sup>-1</sup>), ceftiofur (CEF, 8 µg ml<sup>-1</sup>), meropenem (MEM, 0.125 µg ml<sup>-1</sup>), or ciprofloxacin (CIP, 0.5 µg ml<sup>-1</sup>). For the selection of sulfonamide-resistant fosmid clones, Iso-Sensitest agar (Oxoid, Nepean, ON) supplemented with sulfamethazine (SMZ, 2,000 µg ml<sup>-1</sup>) was used. To assess

clonality, fosmid DNA recovered from individual clones selected by using the same antibiotic was digested with *NotI* to distinguish any redundant clones based on their restriction-patterns.

***Fosmid sequencing and bioinformatics parameter.*** To resolve the metagenomic DNA insert sequence of selected fosmids, sequencing libraries were generated using the Nextera XT DNA Library Preparation and Index kits (Illumina, Victoria, BC) with fosmid DNA that were pre-treated with Plasmid-Safe<sup>TM</sup> ATP-Dependent DNase (Epicentre) to remove any residual chromosomal DNA contaminant. Multiplex sequencings (up to 43 samples in a single run) were performed on a MiSeq desktop sequencer using the MiSeq Reagent Kit v2 500-cycle (Illumina). Prior to assembly, all sequencing reads had pCC1FOS sequence-containing reads removed using Bowtie v. 1.1.1 with the *-v* option (5) on a 64-bit Ubuntu 14.04 installation. *De novo* assembly of the fosmid insert sequences was then performed using the first 100,000 reads and Velvet v. 1.2.10 (6) on the same machine. The chosen k-mer sizes were between 95 and 125 to obtain coverage of ca. 100- to 150- fold. MetaGeneMark (7) was used to identify genes and open-reading frames (ORFs), which were then subjected to functional annotation by HMMER3 (8). ISfinder (9) was utilized in searching for any bacterial insertion sequences and PhyloPthyaS (10) in classifying the taxonomic origin of metagenomic DNA.

***PCR and molecular cloning of ARGs.*** Generally, PCR amplification was achieved in a 50- $\mu$ l reaction mixture containing ca. 10 ng of fosmid DNA, 1 U of Phusion high-fidelity DNA polymerase (New England BioLabs Ltd., Pickering, ON), 1X Phusion HF buffer, primers at a final concentration (each) of 0.5  $\mu$ M, and deoxynucleoside triphosphates (dNTPs) at a final concentration of 200  $\mu$ M. The mixture was heated for 30 sec at 98°C, followed by 30 cycle of 10 sec at 98°C, 30 sec at 72°C and 15 - 75 sec at 72°C (see **Table 10**), before finishing with 10 min at 72°C. For restriction endonuclease digestion, ligation, transformation, plasmid isolation, and

agarose gel electrophoresis, standard protocols as described by Sambrook and Russell (11) were used. All plasmid-cloned DNA fragments were sequenced (Robarts Research Institute, London, ON) using universal and custom primers, to verify that no unintended mutations were introduced during PCR.

**Proteomics analysis.** Overnight *E. coli* culture (2 – 4 ml) with final OD<sub>600nm</sub> value of ca. 2.0 was pelleted, resuspended in 500 µl of ice-cold ammonium bicarbonate (50 mM), and sonicated using a Q125 sonicator (Qsonica) with the cell suspension kept on ice throughout (six bursts of 15 sec at 40% power with 30 sec resting intervals). Following centrifugation (16,000 x g, 10 min, 4°C) to remove insoluble cell debris and unbroken cell, ~ 100 µg of protein was incubated with 200 µl 0.1% RapiGest™ SF surfactant (Waters Corp.) at 99 °C for 2 min. After cooling, the sample was reduced by incubating with 5 mM dithiothreitol at 60 °C for 30 min, and acetylated with 15 mM iodoacetamide in the dark for another 30 min at room temperature. Samples were incubated overnight with MS-grade trypsin protease (1:40) (Thermo-Fisher Scientific), in the presence of 1 mM CaCl<sub>2</sub>, at 37 °C with mild agitation. Hydrochloric acid was added (final pH < 2) to precipitate the RapiGest™ detergent, which was subsequently removed by centrifugation. The peptide digests were analyzed using an Easy-nLC 1000 nano system with the Acclaim C18 PepMap™ trap column (100 µm x 2 cm) and analytical column (75 µm x 15 cm), coupled to a Q-Exactive Orbitrap mass spectrometer (Thermo-Fisher Scientific). The flow rate was 300 nL min<sup>-1</sup> and 10 µL of the protein digest was injected. 97% mobile phase A (LC/MS Optima water, 0.1% formic acid) was decreased to 90% over 4 min. Peptides were eluted with a linear gradient from 10 - 35% mobile phase B (LC/MS Optima acetonitrile 0.1% formic acid) over 70 min followed by 35 - 90% over 4 min and maintained for 16 min. The nanospray voltage was set at 1.95 kV, capillary temperature 275 °C, and S-lens RF level 60. Each sample was analyzed by a

top 10 data-dependent acquisition experiment. The full scan was operated at 70,000 resolution, automatic gain control (AGC) of  $1 \times e^6$  and maximum injection time (IT) of 240 ms. The MS/MS scans were acquired at 17,500 resolution, AGC of  $1 \times e^5$ , maximum IT of 110 ms, intensity threshold of  $8 \times 10^4$ , normalized collision energy of 27 and isolation window of 2.0 *m/z*. Unassigned, singly and >4 charged peptides were not selected for MS/MS and a 20 sec dynamic exclusion was used. The Thermo *.raw* files were converted to *.mgf* using Proteowizard v2 (12). The MS/MS scans were searched against the target/reverse proteome of *E. coli* MG1655 (Proteome ID UP0000625, accessed April, 2016) with an additional 39 annotated gene products derived from fosmid MACRO-AZI 4 using the X!tandem search algorithm (13) operated from the SearchGUI v.2.35 interface (14) and processed in PeptideShaker v1.3.6 (15). In addition, a second search under the same conditions was completed using the *E. coli* MG1655 proteome with protein sequences deduced from all six possible reading frames (including PPP<sup>AZI 4</sup>) encompassed by the subcloned fragment of pCL043. A 3 ppm precursor ion mass error and a 0.02 Da product ion error were used along with carbamidomethylation as a constant modification and oxidation of methionine as variable. A 1% FDR rate was used at the protein, peptide and peptide spectrum match level.

**TABLE S1 Antibiotic susceptibility of soil metagenomic fosmid isolates derived from *E. coli* EPI300-T1<sup>R</sup> strain**

| Fosmid Candidates | Minimal Inhibitory Concentration (µg/mL) <sup>a, b, c</sup> |     |     |     |      |     |     |      |      |     |      |      |       |     |       |      |       |     |     |       |     |       |
|-------------------|-------------------------------------------------------------|-----|-----|-----|------|-----|-----|------|------|-----|------|------|-------|-----|-------|------|-------|-----|-----|-------|-----|-------|
|                   | KAN                                                         | GEN | AMI | TET | CTC  | OTC | TIG | TYL  | ERY  | AZI | CLR  | LIN  | CIP   | RIF | PXB   | MEM  | AMP   | FOX | CAZ | CRB   | CEF | CAX   |
| pCC1FOS           | 8                                                           | 8   | 4   | 4   | 64   | 4   | 1   | 2048 | 256  | 16  | 256  | 256  | 0.016 | 16  | 0.125 | 0.03 | 8     | 16  | 2   | 16    | 0.5 | 0.125 |
| <i>Group I</i>    |                                                             |     |     |     |      |     |     |      |      |     |      |      |       |     |       |      |       |     |     |       |     |       |
| UTC-KAN K1        | 3200                                                        |     | 8   |     |      |     |     |      |      | -   | -    | -    |       |     |       |      |       |     |     | -     | -   | -     |
| SCT-KAN 4         | 128                                                         |     | 16  |     |      |     |     |      |      | -   | -    | -    |       |     |       |      |       |     |     | -     | -   | -     |
| <i>Group II</i>   |                                                             |     |     |     |      |     |     |      |      |     |      |      |       |     |       |      |       |     |     |       |     |       |
| UTC-SMZ B27       |                                                             |     | -   |     | -    | -   |     |      |      | -   | -    | -    |       |     |       |      |       |     |     | -     | -   | -     |
| SCT-SMZ 28        |                                                             |     | -   |     | -    | -   |     |      |      | -   | -    | -    |       |     |       |      |       |     |     | -     | -   | -     |
| SCT-SMZ 29        |                                                             |     | -   |     | -    | -   |     |      |      | -   | -    | -    |       |     |       |      |       |     |     | -     | -   | -     |
| <i>Group III</i>  |                                                             |     |     |     |      |     |     |      |      |     |      |      |       |     |       |      |       |     |     |       |     |       |
| MACRO-MEM A1      |                                                             |     | -   |     | -    | -   |     |      |      | -   | -    | -    |       |     |       | 32   | 256   | 256 | 16  | 32    | 128 | 64    |
| MACRO-MEM B2      |                                                             |     | -   |     | -    | -   |     |      |      | -   | -    | -    |       |     |       | 16   | >1024 | 256 | 64  | >2048 | 16  | 8     |
| MACRO-MEM B3      |                                                             |     | -   |     | -    | -   |     |      |      | -   | -    | -    |       |     |       | 32   | >1024 | 256 | 256 | >2048 | 32  | 32    |
| <i>Group IV</i>   |                                                             |     |     |     |      |     |     |      |      |     |      |      |       |     |       |      |       |     |     |       |     |       |
| SCT-TET 7         |                                                             |     | -   | 64  | 1024 | 32  |     |      |      |     |      | 1024 |       |     |       |      |       |     |     | -     | -   | -     |
| MACRO-TET B9      |                                                             |     | -   | 32  | 256  | 32  | 2   |      |      |     |      | 512  |       |     |       |      |       |     |     | -     | -   | -     |
| MACRO-TET A9      |                                                             |     | -   | 32  | 256  | 32  |     |      |      |     |      | 1024 | 0.032 |     |       |      |       |     |     | -     | -   | -     |
| SCT-TET 23        |                                                             |     | -   | 16  | 256  | 32  |     |      |      |     |      | 4096 | 0.064 |     |       |      |       |     |     | -     | -   | -     |
| UTC-TET 1         |                                                             |     | -   | 8   | 128  | 16  |     |      |      |     |      | 512  | 0.032 |     |       |      |       |     |     | -     | -   | -     |
| <i>Group V</i>    |                                                             |     |     |     |      |     |     |      |      |     |      |      |       |     |       |      |       |     |     |       |     |       |
| MACRO-AZI 1       |                                                             |     | -   |     | -    | -   |     | 4096 | 2048 | 64  |      | 4096 | 0.25  |     |       |      |       |     |     | -     | -   | -     |
| SCT-ERY 2         |                                                             |     | -   |     | -    | -   |     | 4096 | 512  |     |      | 2048 | 0.25  |     |       |      |       |     |     | -     | -   | -     |
| MACRO-TYL 17      |                                                             |     | -   |     | -    | -   | 2   | 8192 |      |     |      | 512  |       |     |       |      |       |     |     | -     | -   | -     |
| MACRO-AZI 4       |                                                             |     | -   |     | -    | -   |     | 8192 | 512  | 64  | 512  |      |       |     |       |      |       |     |     | -     | -   | -     |
| MACRO-TYL 4       |                                                             |     | -   |     | -    | -   |     | 4096 | 512  | 64  | 512  |      |       |     |       |      |       |     |     | -     | -   | -     |
| MACRO-TYL 10      |                                                             | 4   | -   |     | -    | -   |     | 4096 | 512  | 32  | 512  |      |       |     |       |      |       |     |     | -     | -   | -     |
| MACRO-AZI 6       |                                                             |     | -   |     | -    | -   |     |      | 512  | 64  | 1024 |      |       |     |       |      |       |     |     | -     | -   | -     |
| MACRO-ERY 9       |                                                             |     | -   |     | -    | -   |     |      | 512  | 64  | 1024 |      |       |     |       |      |       |     |     | -     | -   | -     |
| MACRO-ERY 41      |                                                             |     | -   |     | -    | -   |     |      | 512  |     |      |      |       |     |       |      |       |     |     | -     | -   | -     |

*Group VI*

|              |   |    |     |    |    |      |      |    |      |      |   |   |
|--------------|---|----|-----|----|----|------|------|----|------|------|---|---|
| MACRO-TET A7 | - | 64 | 512 | 64 | 16 | 8192 | 1024 | 64 | 1024 | -    | - | - |
| MACRO-TET A6 | - | 32 | 256 | 64 | 4  | 4096 | 512  | 32 | 512  | 8    | - | - |
| MACRO-TET A3 | - | 32 | 256 | 64 | 4  | 512  |      |    | 1024 | -    | - | - |
| SCT-TET 22   | - | 32 | 256 | 32 | 4  | 1024 | 32   |    | 1024 | -    | - | - |
| MACRO-TET B1 | - | 32 | 256 | 32 | 4  | 1024 | 32   |    | 1024 | -    | - | - |
| SCT-TET 24   | - | 32 | 256 | 32 | 4  | 1024 | 32   |    | 512  | -    | - | - |
| MACRO-TET B2 | - | 16 | 256 | 32 | 4  | 512  |      |    | 512  | -    | - | - |
| MACRO-ERY 18 | - | 16 | 256 | 32 | 8  | 4096 | 1024 | 32 |      | -    | - | - |
| MACRO-TET B7 | - | 32 | 512 | 8  |    | 4096 | 512  | 32 | 128  | 1024 | - | - |

<sup>a</sup> Only values that are difference from the pCC1FOS-carrying control strain are included.

<sup>b</sup> AMI, amikacin; AMP, ampicillin; AZI, azithromycin; CAX, cefotaxime; CAZ, ceftazidime; CEF, ceftiofur; CIP, ciprofloxacin; CLR, clarithromycin; CRB, carbenicillin; CTC, chlortetracycline; ERY, erythromycin; FOX, cefoxitin; GEN, gentamicin; KAN, kanamycin; LIN, lincomycin; MEM, meropenem; OTC, oxytetracycline; PXB, polymyxin; RIF, rifampicin; TET, tetracycline; TIG, tigecycline; TYL, tylosin.

<sup>c</sup> -, MIC values not determined.



**TABLE S2 Elements inferring antibiotic resistance and gene mobility identified bioinformatically from soil-derived metagenomic fosmid clones**

| Fosmid           | ORF# | Description of best blastX match [bacterial species]                                                                | Predicted mechanism <sup>a</sup> | Sequence identity (%) | Sequence coverage (%) | Accession no.  |
|------------------|------|---------------------------------------------------------------------------------------------------------------------|----------------------------------|-----------------------|-----------------------|----------------|
| <i>Group I</i>   |      |                                                                                                                     |                                  |                       |                       |                |
| SCT-KAN 4        | 23   | daunorubicin resistance protein DrrA family ABC transporter ATP-binding protein [ <i>Planomonospora sphaerica</i> ] | Efflux                           | 69%                   | 96%                   | GAT66031.1     |
|                  | 24   | multidrug ABC transporter permease [ <i>Planomonospora sphaerica</i> ]                                              | Efflux                           | 70%                   | 93%                   | GAT66030.1     |
| <i>Group II</i>  |      |                                                                                                                     |                                  |                       |                       |                |
| SCT-SMZ 28       | 5    | MULTISPECIES: integrase [Proteobacteria]                                                                            | LGT                              | 100%                  | 99%                   | WP_000954590.1 |
|                  | 6    | regulatory protein repA [ <i>Shigella dysenteriae</i> 1617]                                                         | LGT                              | 100%                  | 95%                   | EFP73965.1     |
|                  | 7    | MULTISPECIES: replication protein C [Proteobacteria]                                                                | LGT                              | 100%                  | 99%                   | WP_000743064.1 |
|                  | 9    | conjugal transfer protein TrbJ [uncultured bacterium IN-11]                                                         | LGT                              | 100%                  | 70%                   | AMP42399.1     |
|                  | 10   | Arsenate reductase [ <i>Gallibacterium anatis</i> ]                                                                 | Enzymatic                        | 99%                   | 99%                   | WP_039159282.1 |
|                  | 11   | Arsenic resistance protein ArsH [ <i>Shigella dysenteriae</i> WRSd3]                                                | Enzymatic                        | 100%                  | 99%                   | ESU81725.1     |
|                  | 13   | MULTISPECIES: resolvase [Proteobacteria]                                                                            | LGT                              | 100%                  | 99%                   | WP_001366550.1 |
|                  | 15   | MULTISPECIES: transposase [Proteobacteria]                                                                          | LGT                              | 100%                  | 99%                   | WP_001120888.1 |
| SCT-SMZ 29       | B1   | superfamily II DNA/RNA helicase [ <i>Nitrosomonas eutropha</i> ]                                                    | LGT                              | 65%                   | 100%                  | WP_011634393.1 |
|                  | B2   | restriction endonuclease [ <i>Nitrosomonas eutropha</i> ]                                                           | LGT                              | 59%                   | 99%                   | WP_011634392.1 |
|                  | B20  | replicative DNA helicase [ <i>Halobacteriovorax marinus</i> ]                                                       | LGT                              | 42%                   | 95%                   | WP_014245262.1 |
|                  | B21  | integrase [ <i>Gemmatimonas sp.</i> SG8_17]                                                                         | LGT                              | 42%                   | 91%                   | KPJ94178.1     |
| <i>Group III</i> |      |                                                                                                                     |                                  |                       |                       |                |
| MACRO-MEM A1     | 24   | hydrolase beta-lactamase-like protein [ <i>Janthinobacterium sp.</i> HH01]                                          | Enzymatic                        | 58%                   | 93%                   | ELX11131.1     |
|                  | 32   | metallo-beta-lactamase domain protein [ <i>Candidatus Thiomargarita nelsonii</i> ]                                  | Enzymatic                        | 46%                   | 97%                   | OAD22843.1     |

|                 |    |                                                                                                                      |           |     |     |                |
|-----------------|----|----------------------------------------------------------------------------------------------------------------------|-----------|-----|-----|----------------|
| MACRO-MEM B2    | 16 | MexE family multidrug efflux RND transporter periplasmic adaptor subunit<br>[ <i>Pseudoduganella violaceinigra</i> ] | Efflux    | 92% | 96% | WP_035374780.1 |
|                 | 17 | multidrug efflux RND transporter permease subunit [ <i>Pseudoduganella violaceinigra</i> ]                           | Efflux    | 97% | 99% | WP_028103618.1 |
|                 | 18 | RND transporter [ <i>Pseudoduganella violaceinigra</i> ]                                                             | Efflux    | 94% | 99% | WP_028103617.1 |
|                 | 26 | MULTISPECIES: Ku protein [ <i>Duganella</i> ]                                                                        | LGT       | 96% | 78% | WP_055926129.1 |
| MARCO-MEM B3    | 10 | MULTISPECIES: Ku protein [ <i>Duganella</i> ]                                                                        | LGT       | 96% | 78% | WP_055926129.1 |
|                 | 25 | MBL fold metallo-hydrolase [ <i>Duganella sp.</i> Root1480D1]                                                        | Enzymatic | 95% | 99% | WP_057264869.1 |
| <i>Group IV</i> |    |                                                                                                                      |           |     |     |                |
| SCT-TET 7       | 10 | DNA recombination/repair protein RecA [ <i>Neorhizobium galegae</i> ]                                                | LGT       | 98% | 95% | WP_046636404.1 |
| SCT-TET 23      | 11 | MBL fold metallo-hydrolase [ <i>Leifsonia sp.</i> Root227]                                                           | Enzymatic | 49% | 98% | WP_055892941.1 |
| UTC-TET 1       | 25 | glyoxalase/bleomycin resistance protein/dioxygenase [ <i>Arthrobacter crystallopoietes</i> ]                         | Enzymatic | 68% | 94% | WP_005268767.1 |
| <i>Group V</i>  |    |                                                                                                                      |           |     |     |                |
| MACRO TYL 17    | 19 | aminoglycoside phosphotransferase [ <i>Thermus oshimai</i> ]                                                         | Enzymatic | 52% | 95% | WP_015065425.1 |
| MACRO AZI 4     | 12 | multidrug ABC transporter ATPase/permease [ <i>Gordonibacter pamelaeeae</i> ]                                        | Efflux    | 43% | 94% | WP_015540284.1 |
| MACRO-TYL 10    | 6  | transposase [ <i>Desulfotomaculum kuznetsovii</i> ]                                                                  | LGT       | 35% | 97% | WP_013824420.1 |
|                 | 15 | MBL fold metallo-hydrolase [ <i>Parachlamydia acanthamoebae</i> ]                                                    | Enzymatic | 52% | 95% | WP_013924979.1 |
| MACRO-ERY 41    | 15 | Ku protein [ <i>Chlamydia sp.</i> 'Diamant']                                                                         | LGT       | 54% | 84% | WP_032124496.1 |
|                 | 16 | DNA ligase D [ <i>Cytophaga aurantiaca</i> ]                                                                         | LGT       | 47% | 99% | WP_018344657.1 |
|                 | 22 | EmrB/QacA subfamily drug resistance transporter<br>[ <i>Candidatus Saccharibacteria bacterium_44_17</i> ]            | Efflux    | 57% | 94% | AKM80266.1     |
| <i>Group VI</i> |    |                                                                                                                      |           |     |     |                |
| MACRO TET A6    | 6  | DNA ligase D [ <i>Cytophaga aurantiaca</i> ]                                                                         | LGT       | 48% | 99% | WP_018344657.1 |
|                 | 7  | Ku protein [ <i>Protochlamydia naegleriophila</i> ]                                                                  | LGT       | 53% | 99% | WP_059062007.1 |
| MACRO-TET A7    | 42 | putative exporter of polyketide antibiotics- like protein [ <i>Thermomonospora curvata</i> ]                         | Efflux    | 46% | 95% | WP_012854905.1 |
| MACRO TET A3    | 10 | repair protein RadC protein                                                                                          | LGT       | 48% | 78% | AKM80549.1     |

|              |    |                                                                   |           |     |     |            |
|--------------|----|-------------------------------------------------------------------|-----------|-----|-----|------------|
|              |    | [ <i>Candidatus Saccharibacteria</i> bacterium GW2011_GWC2_44_17] |           |     |     |            |
| MACRO ERY 18 | 35 | recombination protein RecR                                        | LGT       | 72% | 97% | KKU19805.1 |
|              |    | [ <i>Candidatus Saccharibacteria</i> bacterium GW2011_GWA2_46_10] |           |     |     |            |
|              | 38 | Replicative DNA helicase                                          | LGT       | 68% | 96% | KKU19802.1 |
|              |    | [ <i>Candidatus Saccharibacteria</i> bacterium GW2011_GWA2_46_10] |           |     |     |            |
| MACRO TET B7 | 3  | recF protein [ <i>Acidobacteria</i> bacterium OLB17]              | LGT       | 67% | 97% | KXK01516.1 |
|              | 4  | DNA gyrase subunit B [ <i>Acidobacteria</i> bacterium OLB17]      | LGT       | 81% | 99% | KXK01515.1 |
|              | 20 | beta-lactamase [ <i>Acidobacteria</i> bacterium OLB17]            | Enzymatic | 57% | 81% | KXK01503.1 |

<sup>a</sup> LGT, lateral gene transfer

**TABLE S3 Taxonomic assignment of the fosmid-cloned metagenomic DNA using PhyloPythiaS**

| Fosmid candidate | superkingdom    | phylum         | class                 | order                | family                   | genus                                     |
|------------------|-----------------|----------------|-----------------------|----------------------|--------------------------|-------------------------------------------|
| <i>Group I</i>   |                 |                |                       |                      |                          |                                           |
| UTC-KAN K1       |                 |                |                       |                      |                          |                                           |
| a:               | Bacteria        | Proteobacteria | Gammaproteobacteria   | Enterobacteriales    | Enterobacteriaceae       | <b>Escherichia</b>                        |
| b:               | Bacteria        | Proteobacteria | Gammaproteobacteria   | Enterobacteriales    | Enterobacteriaceae       | <b>Escherichia</b>                        |
| SCT-KAN 4        | Bacteria        | Proteobacteria | Alphaproteobacteria   | Rhodobacterales      | Hyphomonadaceae          | <b>Hyphomonas</b>                         |
| <i>Group II</i>  |                 |                |                       |                      |                          |                                           |
| UTC-SMZ B27      | Bacteria        | Acidobacteria  | Acidobacteriia        | Acidobacteriales     | Acidobacteriaceae        | <b>Candidatus<br/>Koribacter</b>          |
| SCT-SMZ 28       | Bacteria        | Proteobacteria | Alphaproteobacteria   | Sphingomonadales     | Sphingomonadaceae        | <b>Sphingopyxis</b>                       |
| SCT-SMZ 29       |                 |                |                       |                      |                          |                                           |
| a:               | Bacteria        | Firmicutes     | Clostridia            | <b>Clostridiales</b> |                          |                                           |
| b:               | Bacteria        | Lentisphaerae  | Lentisphaeria         | Lentisphaerales      | Lentisphaeraceae         | <b>Lentisphaera</b>                       |
| <i>Group III</i> |                 |                |                       |                      |                          |                                           |
| MACRO-MEM A1     | Bacteria        | Proteobacteria | Betaproteobacteria    | Burkholderiales      | Oxalobacteraceae         | <b>Collimonas</b>                         |
| MACRO-MEM B2     | Bacteria        | Proteobacteria | Betaproteobacteria    | Burkholderiales      | Oxalobacteraceae         | <b>Collimonas</b>                         |
| MACRO-MEM B3     | Bacteria        | Proteobacteria | Betaproteobacteria    | Burkholderiales      | Oxalobacteraceae         | <b>Janthinobacterium</b>                  |
| <i>Group IV</i>  |                 |                |                       |                      |                          |                                           |
| SCT-TET 7        | Bacteria        | Proteobacteria | Alphaproteobacteria   | Rhizobiales          | Brucellaceae             | <b>Ochrobactrum</b>                       |
| MACRO-TET B9     | Bacteria        | Proteobacteria | Gammaproteobacteria   | Enterobacteriales    | Enterobacteriaceae       | <b>Providencia</b>                        |
| MACRO-TET A9     | Bacteria        | Proteobacteria | Betaproteobacteria    | Nitrosomonadales     | Nitrosomonadaceae        | <b>Nitrosomonas</b>                       |
| SCT-TET 23       | Bacteria        | Actinobacteria | Actinobacteria        | Coriobacteriales     | <b>Coriobacteriaceae</b> |                                           |
| UTC-TET 1        | <b>Bacteria</b> |                |                       |                      |                          |                                           |
| <i>Group V</i>   |                 |                |                       |                      |                          |                                           |
| MACRO-ERY 4      |                 |                |                       |                      |                          |                                           |
| a:               | Bacteria        | Actinobacteria | Actinobacteria        | Coriobacteriales     | Coriobacteriaceae        | <b>Collinsella</b>                        |
| b:               | Bacteria        | Actinobacteria | <b>Actinobacteria</b> |                      |                          |                                           |
| SCT-ERY 2        | Bacteria        | Acidobacteria  | Blastocatellia        | -                    | -                        | <b>Candidatus<br/>Chloracidobacterium</b> |
| MACRO-TYL 17     | Bacteria        | Proteobacteria | Alphaproteobacteria   | Sphingomonadales     | Sphingomonadaceae        | <b>Citromicrobium</b>                     |
| MACRO-AZI 4      | Bacteria        | Proteobacteria | Betaproteobacteria    | Burkholderiales      | Alcaligenaceae           | <b>Taylorella</b>                         |
| MACRO-TYL 4      | Bacteria        | Firmicutes     | Bacilli               | Bacillales           | Paenibacillaceae         | <b>Thermobacillus</b>                     |

|              |          |                |                       |                  |                          |                       |
|--------------|----------|----------------|-----------------------|------------------|--------------------------|-----------------------|
| MACRO-TYL 10 | Bacteria | Chlamydiae     | Chlamydiia            | Chlamydiales     | Simkaniaceae             | <b>Simkania</b>       |
| MACRO-AZI 6  | Bacteria | Proteobacteria | Betaproteobacteria    | Burkholderiales  | Comamonadaceae           | <b>Acidovorax</b>     |
| MACRO-ERY 9  | Bacteria | Cyanobacteria  | Oscillatoriothycideae | Oscillatoriales  | -                        | <b>Moorea</b>         |
| MACRO-ERY 41 | Bacteria | Proteobacteria | Gammaproteobacteria   | Cellvibrionales  | Cellvibrionaceae         | <b>Teredinibacter</b> |
| Group VI     |          |                |                       |                  |                          |                       |
| SCT-TET 24   | Bacteria | Actinobacteria | Actinobacteria        | Coriobacteriales | <b>Coriobacteriaceae</b> |                       |
| MACRO-TET A6 | Bacteria | Actinobacteria | Actinobacteria        | Coriobacteriales | Coriobacteriaceae        | <b>Atopobium</b>      |
| MACRO-TET A7 | Bacteria | Actinobacteria | Actinobacteria        | Coriobacteriales | Coriobacteriaceae        | <b>Atopobium</b>      |
| MACRO-TET B1 | Bacteria | Actinobacteria | Actinobacteria        | Coriobacteriales | <b>Coriobacteriaceae</b> |                       |
| MACRO-ERY 18 | Bacteria | Firmicutes     | Negativicutes         | Selenomonadales  | Veillonellaceae          | <b>Veillonella</b>    |
| MACRO-TET A3 | Bacteria | Firmicutes     | Negativicutes         | Selenomonadales  | Veillonellaceae          | <b>Thermosinus</b>    |
| MACRO-TET B7 | Bacteria | Proteobacteria | Alphaproteobacteria   | Rhizobiales      | Hyphomicrobiaceae        | <b>Hyphomicrobium</b> |
| SCT-TET 22   | Bacteria | Proteobacteria | Gammaproteobacteria   | Cellvibrionales  | Cellvibrionaceae         | <b>Teredinibacter</b> |
| MACRO-TET B2 | Bacteria | Proteobacteria | Gammaproteobacteria   | Pseudomonadales  | Moraxellaceae            | <b>Psychrobacter</b>  |

---

**TABLE S4** General macrolide resistance conferred by *ppp<sup>AZI4</sup>* is EF-P independent in *E. coli*

| Strain  | Vector | Genotype <sup>a</sup>     |            | Minimal Inhibitory Concentration (µg/ml) <sup>b</sup> |             |            |             |            |             |
|---------|--------|---------------------------|------------|-------------------------------------------------------|-------------|------------|-------------|------------|-------------|
|         |        | <i>ppp<sup>AZI4</sup></i> | <i>efp</i> | TYL                                                   | ERY         | AZI        | CLN         | TLT        | JOS         |
| BW25113 |        |                           |            |                                                       |             |            |             |            |             |
|         | pCF430 | -                         | +          | 4096                                                  | 512         | 64         | 512         | 64         | 1024        |
|         | pCL047 | +                         | +          | <b>16384</b>                                          | <b>1024</b> | <b>256</b> | <b>1024</b> | <b>256</b> | <b>2048</b> |
| MW1014  |        |                           |            |                                                       |             |            |             |            |             |
|         | pCF430 | -                         | -          | 4096                                                  | 512         | 32         | 256         | 64         | 1024        |
|         | pCL047 | +                         | -          | <b>16384</b>                                          | <b>1024</b> | <b>128</b> | <b>512</b>  | <b>256</b> | <b>2048</b> |

<sup>a</sup> -, absent; +, present.

<sup>b</sup> MIC values higher than the corresponding empty vector control's were bolded. AZI, azithromycin; CLN, clarithromycin; ERY, erythromycin; JOS, josamycin; TLT, telithromycin; TYL, tylosin.

## REFERENCES

1. **Topp E, Renaud J, Sumarah M, Sabourin L.** 2016. Reduced persistence of the macrolide antibiotics erythromycin, clarithromycin and azithromycin in agricultural soil following several years of exposure in the field. *Science of The Total Environment* **562**:136-144.
2. **Topp E, Chapman R, Devers-Lamrani M, Hartmann A, Marti R, Martin-Laurent F, Sabourin L, Scott A, Sumarah M.** 2013. Accelerated biodegradation of veterinary antibiotics in agricultural soil following long-term exposure, and isolation of a sulfamethazine-degrading *Microbacterium sp.* *Journal of Environmental Quality* **42**:173-178.
3. **Donato JJ, Moe LA, Converse BJ, Smart KD, Berklein FC, McManus PS, Handelsman J.** 2010. Metagenomic analysis of apple orchard soil reveals antibiotic resistance genes encoding predicted bifunctional proteins. *Applied and Environmental Microbiology* **76**:4396-4401.
4. **Liles MR, Williamson LL, Rodbumrer J, Torsvik V, Goodman RM, Handelsman J.** 2008. Recovery, purification, and cloning of high-molecular-weight DNA from soil microorganisms. *Applied and Environmental Microbiology* **74**:3302-3305.
5. **Langmead B, Trapnell C, Pop M, Salzberg SL.** 2009. Ultrafast and memory-efficient alignment of short DNA sequences to the human genome. *Genome Biology* **10**:R25.
6. **Zerbino DR, Birney E.** 2008. Velvet: Algorithms for *de novo* short read assembly using de Bruijn graphs. *Genome Research* **18**:821-829.
7. **Zhu W, Lomsadze A, Borodovsky M.** 2010. *Ab initio* gene identification in metagenomic sequences. *Nucleic Acids Research* **38**:e132.
8. **Finn RD, Clements J, Eddy SR.** 2011. HMMER web server: interactive sequence similarity searching. *Nucleic Acids Research* **39**:W29-W37.

9. **Siguiet P, Perochon J, Lestrade L, Mahillon J, Chandler M.** 2006. ISfinder: the reference centre for bacterial insertion sequences. *Nucleic Acids Research* **34**:D32-D36.
10. **Patil KR, Roune L, McHardy AC.** 2012. The PhyloPythiaS web server for taxonomic assignment of metagenome sequences. *PLoS ONE* **7**:e38581.
11. **Sambrook J, Russell DW.** 2001. *Molecular cloning: a laboratory manual*. Cold Spring Harbor Laboratory Press, Cold Spring Harbor, NY.
12. **Kessner D, Chambers M, Burke R, Agus D, Mallick P.** 2008. ProteoWizard: open source software for rapid proteomics tools development. *Bioinformatics* **24**:2534-2536.
13. **Craig R, Beavis RC.** 2004. TANDEM: matching proteins with tandem mass spectra. *Bioinformatics* **20**:1466-1467.
14. **Vaudel M, Barsnes H, Berven FS, Sickmann A, Martens L.** 2011. SearchGUI: An open-source graphical user interface for simultaneous OMSSA and X!Tandem searches. *Proteomics* **11**:996-999.
15. **Vaudel M, Burkhardt JM, Zahedi RP, Oveland E, Berven FS, Sickmann A, Martens L, Barsnes H.** 2015. PeptideShaker enables reanalysis of MS-derived proteomics data sets. *Nat Biotech* **33**:22-24.
